# Supplementary material
Source: publisher figshare collection journal article supplement (https://springernature.figshare.com/ndownloader/files/20463126)

# One-round imputation

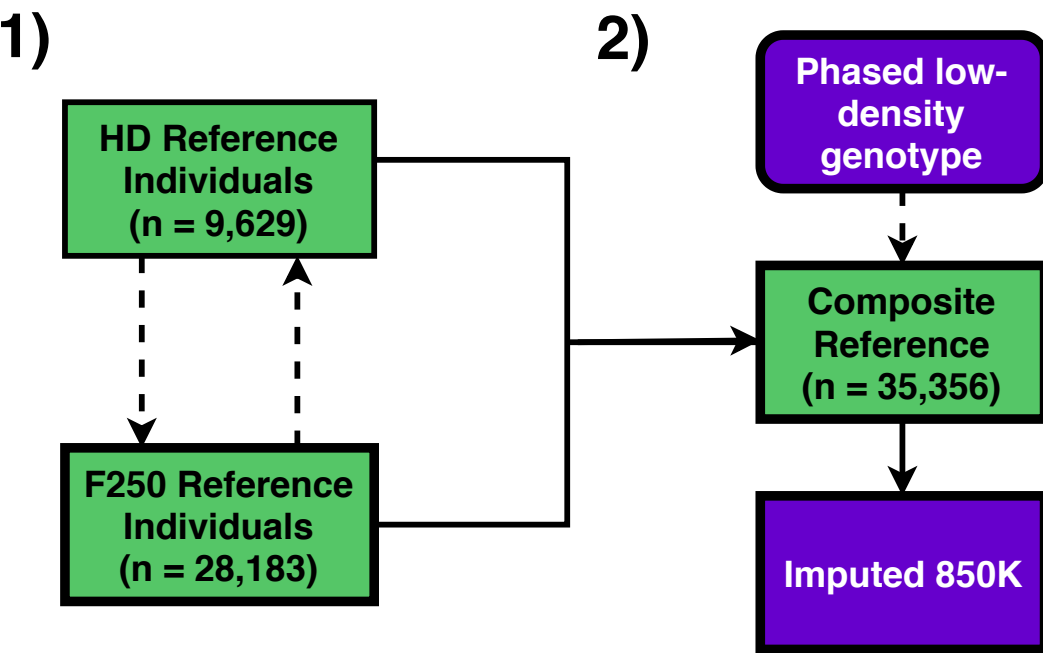

# Two-round imputation

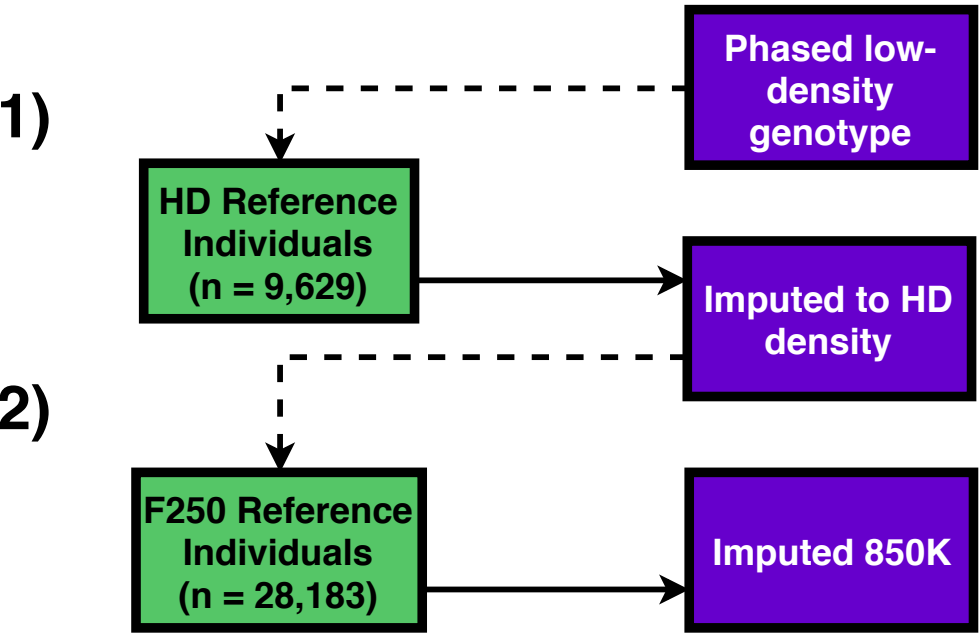

Supplement: Supplementary file [file 20463126]
